# Supplementary material
Source: publisher site journal article supplement (https://www.spandidos-publications.com/2967/downloadSupplementary)
Supplement: Supplementary file 2 [file downloadSupplementary]

## Sheet: Shared DEGs in different times
The list of shared DEGs in Cos
Gene symbol	expression
PPP1R14A	Up-regulated
RGCC	Up-regulated
FKBP5	Up-regulated
MAOA	Up-regulated
AOX1	Up-regulated
CIDEC	Up-regulated
LEPR	Up-regulated
COL11A1	Up-regulated
DUSP23	Up-regulated
EFHD1	Up-regulated
FBN2	Up-regulated
CRYAB	Up-regulated
COL8A1	Up-regulated
SORT1	Up-regulated
TSC22D3	Up-regulated
IMPA2	Up-regulated
FRZB	Up-regulated
IRS2	Up-regulated
ADARB1	Up-regulated
LEP	Up-regulated
GAS1	Up-regulated
LMCD1	Up-regulated
DCN	Up-regulated
CAMK2N1	Up-regulated
PPARG	Up-regulated
ADM	Up-regulated
DDIT4	Up-regulated
NR2F1	Up-regulated
APOD	Up-regulated
TMTC1	Up-regulated
HSPB1	Up-regulated
TRNP1	Up-regulated
CHST7	Up-regulated
EPS8	Up-regulated
ENDOD1	Up-regulated
PTN	Up-regulated
ADH1A	Up-regulated
ANGPT1	Up-regulated
ABCA8	Up-regulated
PTGER2	Up-regulated
MT1X	Up-regulated
NEXN	Up-regulated
CD24	Up-regulated
CEBPD	Up-regulated
ZBTB16	Up-regulated
SVEP1	Up-regulated
FBLN5	Up-regulated
SORBS2	Up-regulated
ADRA1B	Up-regulated
TSPAN18	Up-regulated
MT1M	Up-regulated
TCEAL4	Up-regulated
COX7A1	Up-regulated
CERS6	Up-regulated
ITGA10	Up-regulated
GCHFR	Up-regulated
OLFML2A	Up-regulated
ARL6IP5	Up-regulated
HPS5	Up-regulated
OPN3	Up-regulated
IGFBP2	Up-regulated
OMD	Up-regulated
FZD4	Up-regulated
TCEAL3	Up-regulated
FOXO1	Up-regulated
LHFP	Up-regulated
GAS6	Up-regulated
DCLK1	Up-regulated
PDGFD	Up-regulated
PSAT1	Down-regulated
IL6	Down-regulated
PHGDH	Down-regulated
CXCL12	Down-regulated
IER3	Down-regulated
NRG1	Down-regulated
APCDD1L	Down-regulated
ASNS	Down-regulated
FLG	Down-regulated
SLC7A5	Down-regulated
KRT19	Down-regulated
TUBB3	Down-regulated
LPXN	Down-regulated
LDB2	Down-regulated
MALL	Down-regulated
SHISA2	Down-regulated
FOXD1	Down-regulated
PODXL	Down-regulated
CD44	Down-regulated
C11orf87	Down-regulated
NGF	Down-regulated
HAS2	Down-regulated
ID2	Down-regulated
PHLDA1	Down-regulated
FNDC1	Down-regulated
DPYSL3	Down-regulated
CRABP2	Down-regulated
GPR68	Down-regulated
CLDN11	Down-regulated
EXT1	Down-regulated
RGMB	Down-regulated
FAM129A	Down-regulated
KRT34	Down-regulated
CPA4	Down-regulated
PLAT	Down-regulated
ALPK2	Down-regulated
PRKCA	Down-regulated
TMEM200A	Down-regulated
HBEGF	Down-regulated
ADAMTS1	Down-regulated
PLAUR	Down-regulated
SPHK1	Down-regulated
MARCKSL1	Down-regulated
GREM1	Down-regulated
FOXQ1	Down-regulated
ABL1	Down-regulated
RGS4	Down-regulated
FRMD6	Down-regulated
CSRNP1	Down-regulated
VEGFC	Down-regulated
ALDH1A3	Down-regulated

## Sheet: Shared DEGs expression
The list of DEGs in COs from different times
2VS0	Gene.symbol	Gene name	logFC	adj.P.Val		8VS0	Gene.symbol	Gene name	logFC	adj.P.Val		12VS0	Gene.symbol	Gene name	logFC	adj.P.Val		25VS0	Gene.symbol	Gene name	logFC	adj.P.Val
	ABCA8	ATP binding cassette subfamily A member 8	1.35	0.000186			ABCA8	ATP binding cassette subfamily A member 8	1.83	9.87e-07			ABCA8	ATP binding cassette subfamily A member 8	1.98032	2.46e-05			ABCA8	ATP binding cassette subfamily A member 8	1.99413	1.67e-07
	ABL1	ABL proto-oncogene 1, non-receptor tyrosine kinase	-1.08	0.000422			ABL1	ABL proto-oncogene 1, non-receptor tyrosine kinase	-1.25	1.46e-05			ABL1	ABL proto-oncogene 1, non-receptor tyrosine kinase	-1.30521	0.000438			ABL1	ABL proto-oncogene 1, non-receptor tyrosine kinase	-1.23548	1.19e-05
	ADAMTS1	ADAM metallopeptidase with thrombospondin type 1 motif 1	-1.18	0.0103			ADAMTS1	ADAM metallopeptidase with thrombospondin type 1 motif 1	-2	5.53e-07			ADAMTS1	ADAM metallopeptidase with thrombospondin type 1 motif 1	-1.63673	0.000607			ADAMTS1	ADAM metallopeptidase with thrombospondin type 1 motif 1	-1.78232	3.41e-08
	ADARB1	adenosine deaminase, RNA specific B1	1.83	1.01e-06			ADARB1	adenosine deaminase, RNA specific B1	2.76	3.7e-09			ADARB1	adenosine deaminase, RNA specific B1	2.9631	1.22e-06			ADARB1	adenosine deaminase, RNA specific B1	2.79845	6.68e-10
	ADH1A	alcohol dehydrogenase 1A (class I), alpha polypeptide	1.38	6.38e-06			ADH1A	alcohol dehydrogenase 1A (class I), alpha polypeptide	4.16	8.49e-11			ADH1A	alcohol dehydrogenase 1A (class I), alpha polypeptide	4.58312	1.81e-09			ADH1A	alcohol dehydrogenase 1A (class I), alpha polypeptide	5.23234	1.61e-12
	ADM	adrenomedullin	1.62	9.3e-06			ADM	adrenomedullin	2.4	3.39e-08			ADM	adrenomedullin	2.20026	1.33e-05			ADM	adrenomedullin	1.99651	4.48e-08
	ADRA1B	adrenoceptor alpha 1B	1.21	1.94e-05			ADRA1B	adrenoceptor alpha 1B	1.25	2.71e-05			ADRA1B	adrenoceptor alpha 1B	1.00341	6.21e-06			ADRA1B	adrenoceptor alpha 1B	1.30515	2.92e-07
	ALDH1A3	aldehyde dehydrogenase 1 family member A3	-1.03	0.000156			ALDH1A3	aldehyde dehydrogenase 1 family member A3	-1.1	3.08e-05			ALDH1A3	aldehyde dehydrogenase 1 family member A3	-1.0434	7.66e-05			ALDH1A3	aldehyde dehydrogenase 1 family member A3	-1.07484	7.27e-05
	ALPK2	alpha kinase 2	-1.22	0.000151			ALPK2	alpha kinase 2	-2.3	1.46e-07			ALPK2	alpha kinase 2	-2.06177	6.01e-06			ALPK2	alpha kinase 2	-2.22766	6.11e-08
	ANGPT1	angiopoietin 1	1.37	3.23e-06			ANGPT1	angiopoietin 1	2.71	3.61e-08			ANGPT1	angiopoietin 1	2.96633	1.6e-07			ANGPT1	angiopoietin 1	3.05772	9.94e-11
	AOX1	aldehyde oxidase 1	2.7	1.31e-06			AOX1	aldehyde oxidase 1	2.77	5.61e-09			AOX1	aldehyde oxidase 1	2.60448	3.73e-07			AOX1	aldehyde oxidase 1	2.67182	3.12e-09
	APCDD1L	APC down-regulated 1 like	-2.31	1.98e-07			APCDD1L	APC down-regulated 1 like	-1.85	1.45e-08			APCDD1L	APC down-regulated 1 like	-2.28574	4.81e-06			APCDD1L	APC down-regulated 1 like	-1.52129	3.97e-07
	APOD	apolipoprotein D	1.52	2.3e-06			APOD	apolipoprotein D	6	9.78e-12			APOD	apolipoprotein D	6.87272	1.39e-08			APOD	apolipoprotein D	7.5807	2.69e-13
	ARL6IP5	ADP ribosylation factor like GTPase 6 interacting protein 5	1.13	0.023			ARL6IP5	ADP ribosylation factor like GTPase 6 interacting protein 5	1.25	0.00178			ARL6IP5	ADP ribosylation factor like GTPase 6 interacting protein 5	1.53626	0.000911			ARL6IP5	ADP ribosylation factor like GTPase 6 interacting protein 5	1.33185	0.00122
	ASNS	asparagine synthetase (glutamine-hydrolyzing)	-2.11	6.18e-05			ASNS	asparagine synthetase (glutamine-hydrolyzing)	-2.51	1.19e-07			ASNS	asparagine synthetase (glutamine-hydrolyzing)	-2.36763	2.74e-06			ASNS	asparagine synthetase (glutamine-hydrolyzing)	-2.55593	2.36e-07
	C11orf87	chromosome 11 open reading frame 87	-1.59	2.19e-05			C11orf87	chromosome 11 open reading frame 87	-2.42	8.58e-09			C11orf87	chromosome 11 open reading frame 87	-2.57127	1.42e-07			C11orf87	chromosome 11 open reading frame 87	-2.62194	2.27e-09
	CAMK2N1	calcium/calmodulin dependent protein kinase II inhibitor 1	1.65	3.85e-06			CAMK2N1	calcium/calmodulin dependent protein kinase II inhibitor 1	2.12	9.68e-08			CAMK2N1	calcium/calmodulin dependent protein kinase II inhibitor 1	1.98677	1.15e-06			CAMK2N1	calcium/calmodulin dependent protein kinase II inhibitor 1	2.29627	3.96e-09
	CD24	CD24 molecule	1.29	2.69e-06			CD24	CD24 molecule	2.66	4.12e-09			CD24	CD24 molecule	2.69288	1.32e-07			CD24	CD24 molecule	2.05743	2.88e-08
	CD44	CD44 molecule (Indian blood group)	-1.59	1.27e-05			CD44	CD44 molecule (Indian blood group)	-1.78	1.62e-06			CD44	CD44 molecule (Indian blood group)	-2.04152	2.32e-06			CD44	CD44 molecule (Indian blood group)	-2.13216	4.4e-08
	CEBPD	CCAAT/enhancer binding protein delta	1.28	9.46e-06			CEBPD	CCAAT/enhancer binding protein delta	1.63	1.24e-07			CEBPD	CCAAT/enhancer binding protein delta	1.78737	3.3e-07			CEBPD	CCAAT/enhancer binding protein delta	1.76703	1.77e-08
	CERS6	ceramide synthase 6	1.16	9.91e-06			CERS6	ceramide synthase 6	1.57	1.57e-07			CERS6	ceramide synthase 6	1.69807	2.49e-06			CERS6	ceramide synthase 6	1.89858	3.41e-08
	CHST7	carbohydrate sulfotransferase 7	1.47	2.36e-06			CHST7	carbohydrate sulfotransferase 7	1.48	1.16e-07			CHST7	carbohydrate sulfotransferase 7	1.13687	5.26e-06			CHST7	carbohydrate sulfotransferase 7	1.3849	6.88e-08
	CIDEC	cell death inducing DFFA like effector c	2.69	1.52e-08			CIDEC	cell death inducing DFFA like effector c	4.2	4.92e-09			CIDEC	cell death inducing DFFA like effector c	4.10874	1.32e-09			CIDEC	cell death inducing DFFA like effector c	3.96913	9.94e-11
	CLDN11	claudin 11	-1.41	0.000945			CLDN11	claudin 11	-2.24	3.83e-07			CLDN11	claudin 11	-1.89536	1.6e-06			CLDN11	claudin 11	-2.07489	1.55e-07
	COL11A1	collagen type XI alpha 1 chain	2.46	7.14e-08			COL11A1	collagen type XI alpha 1 chain	4.7	8.27e-10			COL11A1	collagen type XI alpha 1 chain	4.97411	1.32e-09			COL11A1	collagen type XI alpha 1 chain	5.29711	8.61e-12
	COL8A1	collagen type VIII alpha 1 chain	2.14	9.92e-07			COL8A1	collagen type VIII alpha 1 chain	2.81	6.2e-09			COL8A1	collagen type VIII alpha 1 chain	2.85437	5.34e-08			COL8A1	collagen type VIII alpha 1 chain	2.94238	5.31e-10
	COX7A1	cytochrome c oxidase subunit 7A1	1.17	0.00207			COX7A1	cytochrome c oxidase subunit 7A1	1.33	6.46e-05			COX7A1	cytochrome c oxidase subunit 7A1	1.56234	8.15e-05			COX7A1	cytochrome c oxidase subunit 7A1	1.55934	2.07e-06
	CPA4	carboxypeptidase A4	-1.26	5.34e-05			CPA4	carboxypeptidase A4	-1.43	1.49e-06			CPA4	carboxypeptidase A4	-1.32099	3.25e-05			CPA4	carboxypeptidase A4	-1.63106	2.62e-07
	CRABP2	cellular retinoic acid binding protein 2	-1.42	6.85e-06			CRABP2	cellular retinoic acid binding protein 2	-1.44	4.46e-07			CRABP2	cellular retinoic acid binding protein 2	-1.50767	1.91e-06			CRABP2	cellular retinoic acid binding protein 2	-1.51013	9.68e-08
	CRYAB	crystallin alpha B	2.29	2.46e-06			CRYAB	crystallin alpha B	2.24	1.67e-08			CRYAB	crystallin alpha B	1.99598	1.96e-05			CRYAB	crystallin alpha B	1.64435	2.07e-08
	CSRNP1	cysteine and serine rich nuclear protein 1	-1.04	3.94e-05			CSRNP1	cysteine and serine rich nuclear protein 1	-1.23	3.81e-07			CSRNP1	cysteine and serine rich nuclear protein 1	-1.31526	2.86e-05			CSRNP1	cysteine and serine rich nuclear protein 1	-1.01751	3.78e-07
	CXCL12	C-X-C motif chemokine ligand 12	-2.57	2.3e-06			CXCL12	C-X-C motif chemokine ligand 12	-3.26	7.31e-08			CXCL12	C-X-C motif chemokine ligand 12	-3.55166	1.36e-07			CXCL12	C-X-C motif chemokine ligand 12	-3.65817	3.25e-09
	DCLK1	doublecortin like kinase 1	1.03	0.000457			DCLK1	doublecortin like kinase 1	1.54	2.44e-08			DCLK1	doublecortin like kinase 1	1.53774	3.82e-06			DCLK1	doublecortin like kinase 1	1.72354	2.89e-09
	DCN	decorin	1.67	1.28e-05			DCN	decorin	2.54	6.03e-09			DCN	decorin	2.85585	1.28e-07			DCN	decorin	2.44099	2.91e-08
	DDIT4	DNA damage inducible transcript 4	1.56	1.19e-05			DDIT4	DNA damage inducible transcript 4	2.11	3.6e-07			DDIT4	DNA damage inducible transcript 4	2.0605	1.22e-06			DDIT4	DNA damage inducible transcript 4	2.58787	1.52e-08
	DPYSL3	dihydropyrimidinase like 3	-1.43	6.14e-05			DPYSL3	dihydropyrimidinase like 3	-1.63	1.64e-06			DPYSL3	dihydropyrimidinase like 3	-1.79186	4.09e-06			DPYSL3	dihydropyrimidinase like 3	-1.83773	4.64e-08
	DUSP23	dual specificity phosphatase 23	2.42	1.27e-05			DUSP23	dual specificity phosphatase 23	2.63	2.48e-09			DUSP23	dual specificity phosphatase 23	2.73458	1.32e-07			DUSP23	dual specificity phosphatase 23	2.84426	5.49e-10
	EFHD1	EF-hand domain family member D1	2.34	2.19e-06			EFHD1	EF-hand domain family member D1	2.88	1.28e-08			EFHD1	EF-hand domain family member D1	2.89373	1.09e-07			EFHD1	EF-hand domain family member D1	2.82803	3.68e-09
	ENDOD1	endonuclease domain containing 1	1.41	3.21e-05			ENDOD1	endonuclease domain containing 1	1.76	3.48e-07			ENDOD1	endonuclease domain containing 1	1.64335	4.95e-06			ENDOD1	endonuclease domain containing 1	1.52329	1.01e-06
	EPS8	epidermal growth factor receptor pathway substrate 8	1.45	2.36e-06			EPS8	epidermal growth factor receptor pathway substrate 8	1.19	5.46e-05			EPS8	epidermal growth factor receptor pathway substrate 8	1.3265	4.2e-05			EPS8	epidermal growth factor receptor pathway substrate 8	1.2788	8.09e-07
	EXT1	exostosin glycosyltransferase 1	-1.38	2.12e-05			EXT1	exostosin glycosyltransferase 1	-1.15	2.39e-07			EXT1	exostosin glycosyltransferase 1	-1.45704	0.000133			EXT1	exostosin glycosyltransferase 1	-1.33937	1.8e-07
	FAM129A	family with sequence similarity 129 member A	-1.31	2.15e-05			FAM129A	family with sequence similarity 129 member A	-1.33	3.6e-06			FAM129A	family with sequence similarity 129 member A	-1.2252	1.45e-05			FAM129A	family with sequence similarity 129 member A	-1.32577	6.78e-07
	FBLN5	fibulin 5	1.24	8.16e-06			FBLN5	fibulin 5	2.71	3.7e-09			FBLN5	fibulin 5	2.3811	8.07e-08			FBLN5	fibulin 5	2.68384	6.68e-10
	FBN2	fibrillin 2	2.33	6.49e-06			FBN2	fibrillin 2	3.37	2.24e-09			FBN2	fibrillin 2	3.1794	4.9e-06			FBN2	fibrillin 2	2.47605	1.29e-07
	FKBP5	FK506 binding protein 5	2.94	6.42e-06			FKBP5	FK506 binding protein 5	3.98	1.92e-10			FKBP5	FK506 binding protein 5	3.95493	3.76e-09			FKBP5	FK506 binding protein 5	4.1657	3.22e-11
	FLG	filaggrin	-2.08	5.83e-06			FLG	filaggrin	-2.29	1.72e-07			FLG	filaggrin	-2.37974	1.22e-06			FLG	filaggrin	-2.38129	6.4e-08
	FNDC1	fibronectin type III domain containing 1	-1.44	6.38e-06			FNDC1	fibronectin type III domain containing 1	-2.36	4.96e-08			FNDC1	fibronectin type III domain containing 1	-2.22649	1.32e-07			FNDC1	fibronectin type III domain containing 1	-2.12107	5.6e-08
	FOXD1	forkhead box D1	-1.65	5.4e-06			FOXD1	forkhead box D1	-1.58	1.46e-07			FOXD1	forkhead box D1	-1.60853	4.69e-06			FOXD1	forkhead box D1	-1.60537	2.98e-07
	FOXO1	forkhead box O1	1.05	0.000466			FOXO1	forkhead box O1	2.26	1.11e-07			FOXO1	forkhead box O1	2.21017	3.1e-05			FOXO1	forkhead box O1	2.95842	1.16e-09
	FOXQ1	forkhead box Q1	-1.14	1.86e-05			FOXQ1	forkhead box Q1	-1.07	3.48e-06			FOXQ1	forkhead box Q1	-1.12436	1.24e-05			FOXQ1	forkhead box Q1	-1.02577	1.89e-06
	FRMD6	FERM domain containing 6	-1.04	2.23e-05			FRMD6	FERM domain containing 6	-1.64	2.44e-08			FRMD6	FERM domain containing 6	-1.48855	6.01e-06			FRMD6	FERM domain containing 6	-1.42389	7.88e-07
	FRZB	frizzled-related protein	1.88	2.24e-06			FRZB	frizzled-related protein	4.1	9.27e-11			FRZB	frizzled-related protein	4.66686	1.32e-09			FRZB	frizzled-related protein	4.84092	5.31e-10
	FZD4	frizzled class receptor 4	1.06	5.03e-05			FZD4	frizzled class receptor 4	1.71	2.18e-08			FZD4	frizzled class receptor 4	1.84622	2.96e-06			FZD4	frizzled class receptor 4	2.19047	4.67e-10
	GAS1	growth arrest specific 1	1.8	5.57e-05			GAS1	growth arrest specific 1	2.34	4.35e-07			GAS1	growth arrest specific 1	2.43723	1.32e-05			GAS1	growth arrest specific 1	2.49735	6.92e-08
	GAS6	growth arrest specific 6	1.04	0.000127			GAS6	growth arrest specific 6	2.09	7.62e-07			GAS6	growth arrest specific 6	2.17148	5.57e-06			GAS6	growth arrest specific 6	1.93449	1.18e-07
	GCHFR	GTP cyclohydrolase I feedback regulator	1.15	5.46e-05			GCHFR	GTP cyclohydrolase I feedback regulator	2.07	5.47e-06			GCHFR	GTP cyclohydrolase I feedback regulator	2.61966	2.2e-06			GCHFR	GTP cyclohydrolase I feedback regulator	2.49268	2.18e-08
	GPR68	G protein-coupled receptor 68	-1.42	1.07e-05			GPR68	G protein-coupled receptor 68	-1.62	5.2e-08			GPR68	G protein-coupled receptor 68	-1.56768	5.47e-07			GPR68	G protein-coupled receptor 68	-1.57876	2.47e-08
	GREM1	gremlin 1, DAN family BMP antagonist	-1.15	0.00124			GREM1	gremlin 1, DAN family BMP antagonist	-2.73	2.39e-07			GREM1	gremlin 1, DAN family BMP antagonist	-3.02608	1.11e-06			GREM1	gremlin 1, DAN family BMP antagonist	-3.26403	3.2e-08
	HAS2	hyaluronan synthase 2	-1.56	0.000186			HAS2	hyaluronan synthase 2	-2.29	8.18e-07			HAS2	hyaluronan synthase 2	-2.28358	4.9e-06			HAS2	hyaluronan synthase 2	-2.31091	3.01e-07
	HBEGF	heparin binding EGF like growth factor	-1.18	6.01e-05			HBEGF	heparin binding EGF like growth factor	-1.62	4.28e-07			HBEGF	heparin binding EGF like growth factor	-1.5876	2.09e-06			HBEGF	heparin binding EGF like growth factor	-1.66384	2.03e-07
	HPS5	HPS5, biogenesis of lysosomal organelles complex 2 subunit 2	1.11	0.000186			HPS5	HPS5, biogenesis of lysosomal organelles complex 2 subunit 2	1.36	1.8e-07			HPS5	HPS5, biogenesis of lysosomal organelles complex 2 subunit 2	1.47956	3.75e-06			HPS5	HPS5, biogenesis of lysosomal organelles complex 2 subunit 2	1.47	1.36e-07
	HSPB1	heat shock protein family B (small) member 1	1.51	0.000296			HSPB1	heat shock protein family B (small) member 1	1.69	9.7e-06			HSPB1	heat shock protein family B (small) member 1	1.5523	0.00125			HSPB1	heat shock protein family B (small) member 1	1.38648	1.38e-05
	ID2	inhibitor of DNA binding 2, HLH protein	-1.46	6.42e-06			ID2	inhibitor of DNA binding 2, HLH protein	-2.54	1.88e-08			ID2	inhibitor of DNA binding 2, HLH protein	-1.81236	3.14e-06			ID2	inhibitor of DNA binding 2, HLH protein	-2.26797	4.82e-08
	IER3	immediate early response 3	-2.38	9.52e-07			IER3	immediate early response 3	-2.82	2.48e-09			IER3	immediate early response 3	-2.79127	3.24e-08			IER3	immediate early response 3	-2.80078	1.34e-08
	IGFBP2	insulin like growth factor binding protein 2	1.09	0.00223			IGFBP2	insulin like growth factor binding protein 2	2.29	2.14e-08			IGFBP2	insulin like growth factor binding protein 2	2.27539	3.3e-05			IGFBP2	insulin like growth factor binding protein 2	2.95748	1.02e-08
	IL6	interleukin 6	-2.83	1.69e-07			IL6	interleukin 6	-2.8	4.84e-09			IL6	interleukin 6	-2.88989	3.24e-08			IL6	interleukin 6	-2.84533	1.42e-09
	IMPA2	inositol monophosphatase 2	1.96	3.02e-05			IMPA2	inositol monophosphatase 2	1.63	5e-05			IMPA2	inositol monophosphatase 2	1.38823	0.000194			IMPA2	inositol monophosphatase 2	1.71338	4.45e-08
	IRS2	insulin receptor substrate 2	1.87	9.46e-06			IRS2	insulin receptor substrate 2	2.17	8.46e-08			IRS2	insulin receptor substrate 2	2.16066	3.05e-06			IRS2	insulin receptor substrate 2	1.98902	1.66e-07
	ITGA10	integrin subunit alpha 10	1.16	0.000726			ITGA10	integrin subunit alpha 10	2.03	2.4e-08			ITGA10	integrin subunit alpha 10	2.03203	1.68e-05			ITGA10	integrin subunit alpha 10	2.56109	6.26e-09
	KRT19	keratin 19	-2.01	3.36e-06			KRT19	keratin 19	-2.98	1.14e-08			KRT19	keratin 19	-3.2187	1.28e-07			KRT19	keratin 19	-3.4285	2.12e-09
	KRT34	keratin 34	-1.28	6.89e-05			KRT34	keratin 34	-2.47	7.41e-08			KRT34	keratin 34	-2.32657	7.47e-07			KRT34	keratin 34	-2.74683	2.46e-08
	LDB2	LIM domain binding 2	-1.8	3.08e-06			LDB2	LIM domain binding 2	-1.84	8.15e-08			LDB2	LIM domain binding 2	-1.66958	5.41e-06			LDB2	LIM domain binding 2	-1.7579	1.4e-07
	LEP	leptin	1.83	3.22e-05			LEP	leptin	3.88	6.2e-09			LEP	leptin	4.14445	6.88e-09			LEP	leptin	4.24519	9.85e-10
	LEPR	leptin receptor	2.56	1.01e-06			LEPR	leptin receptor	2.83	2.48e-09			LEPR	leptin receptor	3.87736	3.06e-08			LEPR	leptin receptor	3.75769	3.04e-09
	LHFP	lipoma HMGIC fusion partner	1.04	7.59e-05			LHFP	lipoma HMGIC fusion partner	1.13	3.94e-06			LHFP	lipoma HMGIC fusion partner	1.23118	8.65e-06			LHFP	lipoma HMGIC fusion partner	1.40521	3.58e-06
	LMCD1	LIM and cysteine rich domains 1	1.74	1.26e-05			LMCD1	LIM and cysteine rich domains 1	1.9	3.56e-07			LMCD1	LIM and cysteine rich domains 1	2.07431	3.35e-06			LMCD1	LIM and cysteine rich domains 1	1.83008	1.47e-05
	LPXN	leupaxin	-1.81	8.84e-06			LPXN	leupaxin	-1.67	2.73e-07			LPXN	leupaxin	-1.71621	1.69e-06			LPXN	leupaxin	-1.65668	5.16e-08
	MALL	mal, T-cell differentiation protein like	-1.75	8.01e-06			MALL	mal, T-cell differentiation protein like	-2.31	3.93e-08			MALL	mal, T-cell differentiation protein like	-2.43661	1.32e-07			MALL	mal, T-cell differentiation protein like	-2.41566	3.21e-09
	MAOA	monoamine oxidase A	2.88	3.03e-07			MAOA	monoamine oxidase A	3.76	1.48e-09			MAOA	monoamine oxidase A	4.12874	7.98e-09			MAOA	monoamine oxidase A	4.17798	9.94e-11
	MARCKSL1	MARCKS like 1	-1.15	3.94e-05			MARCKSL1	MARCKS like 1	-1.32	8.1e-07			MARCKSL1	MARCKS like 1	-1.14138	0.000191			MARCKSL1	MARCKS like 1	-1.1834	2.85e-06
	MT1M	metallothionein 1M	1.19	0.000104			MT1M	metallothionein 1M	1.46	1.49e-06			MT1M	metallothionein 1M	1.19275	2.89e-05			MT1M	metallothionein 1M	1.57491	2.44e-07
	MT1X	metallothionein 1X	1.32	0.000576			MT1X	metallothionein 1X	2.97	2.4e-08			MT1X	metallothionein 1X	3.09185	7.91e-08			MT1X	metallothionein 1X	3.75828	1.94e-10
	NEXN	nexilin F-actin binding protein	1.3	9.94e-06			NEXN	nexilin F-actin binding protein	1.38	1.91e-06			NEXN	nexilin F-actin binding protein	1.5738	6.6e-06			NEXN	nexilin F-actin binding protein	1.70799	9.89e-08
	NGF	nerve growth factor	-1.58	2.95e-06			NGF	nerve growth factor	-2.35	1.3e-08			NGF	nerve growth factor	-2.35823	9.32e-08			NGF	nerve growth factor	-2.42563	3.36e-09
	NR2F1	nuclear receptor subfamily 2 group F member 1	1.55	2.3e-06			NR2F1	nuclear receptor subfamily 2 group F member 1	1.91	1.26e-08			NR2F1	nuclear receptor subfamily 2 group F member 1	2.04851	9.88e-08			NR2F1	nuclear receptor subfamily 2 group F member 1	1.84513	4.02e-08
	NRG1	neuregulin 1	-2.37	5.08e-07			NRG1	neuregulin 1	-2.45	1.45e-08			NRG1	neuregulin 1	-2.58534	9.08e-08			NRG1	neuregulin 1	-2.42276	3.85e-09
	OLFML2A	olfactomedin like 2A	1.15	0.00023			OLFML2A	olfactomedin like 2A	3.6	4.12e-09			OLFML2A	olfactomedin like 2A	3.57879	4.89e-07			OLFML2A	olfactomedin like 2A	3.8243	3.68e-09
	OMD	osteomodulin	1.08	5.34e-05			OMD	osteomodulin	2.64	8.58e-09			OMD	osteomodulin	3.20361	3.83e-07			OMD	osteomodulin	3.38605	4.79e-10
	OPN3	opsin 3	1.09	0.000289			OPN3	opsin 3	1.28	1.16e-07			OPN3	opsin 3	1.31971	1.92e-06			OPN3	opsin 3	1.56481	2.23e-07
	PDGFD	platelet derived growth factor D	1.02	3.21e-06			PDGFD	platelet derived growth factor D	1.11	1.13e-06			PDGFD	platelet derived growth factor D	1.57148	1.6e-07			PDGFD	platelet derived growth factor D	2.09447	2.12e-09
	PHGDH	phosphoglycerate dehydrogenase	-2.76	3.99e-07			PHGDH	phosphoglycerate dehydrogenase	-3.29	2.24e-09			PHGDH	phosphoglycerate dehydrogenase	-3.17056	5.33e-07			PHGDH	phosphoglycerate dehydrogenase	-3.62494	3.44e-08
	PHLDA1	pleckstrin homology like domain family A member 1	-1.46	6.91e-06			PHLDA1	pleckstrin homology like domain family A member 1	-1.69	1.77e-07			PHLDA1	pleckstrin homology like domain family A member 1	-2.19023	4.53e-07			PHLDA1	pleckstrin homology like domain family A member 1	-1.7709	9.04e-08
	PLAT	plasminogen activator, tissue type	-1.23	7.21e-05			PLAT	plasminogen activator, tissue type	-1.99	1.63e-07			PLAT	plasminogen activator, tissue type	-1.97512	1.82e-06			PLAT	plasminogen activator, tissue type	-1.13993	1.42e-06
	PLAUR	plasminogen activator, urokinase receptor	-1.16	1.75e-05			PLAUR	plasminogen activator, urokinase receptor	-1.59	2.39e-07			PLAUR	plasminogen activator, urokinase receptor	-1.55317	1.91e-06			PLAUR	plasminogen activator, urokinase receptor	-1.68393	1.41e-08
	PODXL	podocalyxin like	-1.62	8.4e-07			PODXL	podocalyxin like	-2.02	5.61e-09			PODXL	podocalyxin like	-2.07957	6.36e-08			PODXL	podocalyxin like	-2.27468	7.79e-08
	PPARG	peroxisome proliferator activated receptor gamma	1.62	3.39e-06			PPARG	peroxisome proliferator activated receptor gamma	2.4	1.82e-09			PPARG	peroxisome proliferator activated receptor gamma	2.62142	1.15e-07			PPARG	peroxisome proliferator activated receptor gamma	2.72436	8.1e-10
	PPP1R14A	protein phosphatase 1 regulatory inhibitor subunit 14A	3.33	2.15e-08			PPP1R14A	protein phosphatase 1 regulatory inhibitor subunit 14A	3.07	2.62e-09			PPP1R14A	protein phosphatase 1 regulatory inhibitor subunit 14A	3.03145	1.6e-08			PPP1R14A	protein phosphatase 1 regulatory inhibitor subunit 14A	2.80655	2.1e-09
	PRKCA	protein kinase C alpha	-1.19	0.000128			PRKCA	protein kinase C alpha	-1.15	3.14e-05			PRKCA	protein kinase C alpha	-1.15089	0.000119			PRKCA	protein kinase C alpha	-1.16557	4.19e-05
	PSAT1	phosphoserine aminotransferase 1	-2.98	1.69e-07			PSAT1	phosphoserine aminotransferase 1	-3.07	6.02e-09			PSAT1	phosphoserine aminotransferase 1	-2.82324	2.55e-08			PSAT1	phosphoserine aminotransferase 1	-2.8665	6.04e-09
	PTGER2	prostaglandin E receptor 2	1.32	3.46e-06			PTGER2	prostaglandin E receptor 2	1.46	1.45e-07			PTGER2	prostaglandin E receptor 2	1.3377	9.06e-07			PTGER2	prostaglandin E receptor 2	1.52365	7.57e-08
	PTN	pleiotrophin	1.39	7.06e-06			PTN	pleiotrophin	1.65	9.43e-07			PTN	pleiotrophin	1.8746	7.4e-06			PTN	pleiotrophin	1.56867	1.35e-08
	RGCC	regulator of cell cycle	3.32	6.39e-07			RGCC	regulator of cell cycle	3.48	4.12e-09			RGCC	regulator of cell cycle	3.71456	1.42e-07			RGCC	regulator of cell cycle	3.92071	6.67e-10
	RGMB	repulsive guidance molecule family member b	-1.33	9.79e-06			RGMB	repulsive guidance molecule family member b	-1.7	5.59e-07			RGMB	repulsive guidance molecule family member b	-1.7861	1.89e-07			RGMB	repulsive guidance molecule family member b	-1.89494	1.55e-08
	RGS4	regulator of G-protein signaling 4	-1.08	0.00129			RGS4	regulator of G-protein signaling 4	-1.86	3.03e-07			RGS4	regulator of G-protein signaling 4	-1.95569	6.21e-06			RGS4	regulator of G-protein signaling 4	-2.19868	9.32e-08
	SHISA2	shisa family member 2	-1.72	3.45e-06			SHISA2	shisa family member 2	-2.09	8.58e-09			SHISA2	shisa family member 2	-2.08352	9.32e-08			SHISA2	shisa family member 2	-2.00868	8.8e-09
	SLC7A5	solute carrier family 7 member 5	-2.08	1.57e-05			SLC7A5	solute carrier family 7 member 5	-2.46	3.86e-07			SLC7A5	solute carrier family 7 member 5	-2.30962	4.13e-06			SLC7A5	solute carrier family 7 member 5	-2.49794	1.21e-07
	SORBS2	sorbin and SH3 domain containing 2	1.23	9.83e-05			SORBS2	sorbin and SH3 domain containing 2	1.15	2.1e-05			SORBS2	sorbin and SH3 domain containing 2	1.29718	0.000136			SORBS2	sorbin and SH3 domain containing 2	1.33852	6.88e-06
	SORT1	sortilin 1	2.12	1.69e-07			SORT1	sortilin 1	2	6.2e-09			SORT1	sortilin 1	2.03854	2.67e-07			SORT1	sortilin 1	2.08119	2.91e-09
	SPHK1	sphingosine kinase 1	-1.16	0.000151			SPHK1	sphingosine kinase 1	-1.1	4.3e-06			SPHK1	sphingosine kinase 1	-1.40232	1.31e-05			SPHK1	sphingosine kinase 1	-1.05888	7.18e-06
	SVEP1	sushi, von Willebrand factor type A, EGF and pentraxin domain containing 1	1.27	7.34e-05			SVEP1	sushi, von Willebrand factor type A, EGF and pentraxin domain containing 1	2.91	4.79e-09			SVEP1	sushi, von Willebrand factor type A, EGF and pentraxin domain containing 1	2.91048	2.15e-06			SVEP1	sushi, von Willebrand factor type A, EGF and pentraxin domain containing 1	2.78565	3.12e-09
	TCEAL3	transcription elongation factor A like 3	1.05	4.55e-05			TCEAL3	transcription elongation factor A like 3	1.36	1.12e-06			TCEAL3	transcription elongation factor A like 3	1.31801	9.44e-06			TCEAL3	transcription elongation factor A like 3	1.4803	4.22e-07
	TCEAL4	transcription elongation factor A like 4	1.18	0.00103			TCEAL4	transcription elongation factor A like 4	1.77	4.45e-07			TCEAL4	transcription elongation factor A like 4	1.68803	2.67e-05			TCEAL4	transcription elongation factor A like 4	1.67582	6.2e-07
	TMEM200A	transmembrane protein 200A	-1.18	4.14e-06			TMEM200A	transmembrane protein 200A	-1.41	5.37e-07			TMEM200A	transmembrane protein 200A	-1.3104	3.14e-06			TMEM200A	transmembrane protein 200A	-1.3103	1.87e-06
	TMTC1	transmembrane and tetratricopeptide repeat containing 1	1.51	0.000128			TMTC1	transmembrane and tetratricopeptide repeat containing 1	2.33	8.38e-08			TMTC1	transmembrane and tetratricopeptide repeat containing 1	2.30896	4.3e-06			TMTC1	transmembrane and tetratricopeptide repeat containing 1	2.4687	5.6e-08
	TRNP1	TMF1-regulated nuclear protein 1	1.5	1.57e-05			TRNP1	TMF1-regulated nuclear protein 1	2.25	1.46e-07			TRNP1	TMF1-regulated nuclear protein 1	2.12682	2e-06			TRNP1	TMF1-regulated nuclear protein 1	1.9329	1.29e-07
	TSC22D3	TSC22 domain family member 3	2.08	3.87e-07			TSC22D3	TSC22 domain family member 3	3.36	2.48e-09			TSC22D3	TSC22 domain family member 3	2.99958	1.31e-08			TSC22D3	TSC22 domain family member 3	3.49192	8.99e-11
	TSPAN18	tetraspanin 18	1.21	6.89e-05			TSPAN18	tetraspanin 18	1.63	2.53e-07			TSPAN18	tetraspanin 18	1.61578	2.09e-06			TSPAN18	tetraspanin 18	1.19106	2.77e-06
	TUBB3	tubulin beta 3 class III	-1.82	8.82e-07			TUBB3	tubulin beta 3 class III	-2.33	6.97e-09			TUBB3	tubulin beta 3 class III	-2.38811	1.15e-07			TUBB3	tubulin beta 3 class III	-3.17692	4.14e-10
	VEGFC	vascular endothelial growth factor C	-1.03	1.65e-05			VEGFC	vascular endothelial growth factor C	-1.44	1.99e-08			VEGFC	vascular endothelial growth factor C	-1.36177	1.36e-07			VEGFC	vascular endothelial growth factor C	-1.1352	5.6e-08
	ZBTB16	zinc finger and BTB domain containing 16	1.27	3.81e-06			ZBTB16	zinc finger and BTB domain containing 16	2.21	4.99e-09			ZBTB16	zinc finger and BTB domain containing 16	2.43447	3.3e-07			ZBTB16	zinc finger and BTB domain containing 16	2.37261	3.68e-09
